# Supplementary material for: Prostate Cancer Liver Metastasis: An Ominous Metastatic Site in Need of Distinct Management Strategies
Source: MDPI journal article supplement (doi:10.3390/jcm13030734), 2024-01-27
Supplement: s1 [file s1]

**Supplementary Materials:**

**Table S1.** Literature Search Strategy through Ovid Medline.

| #         | Query                                                                                                                                        | Results from 9 Feb 2023 |
|-----------|----------------------------------------------------------------------------------------------------------------------------------------------|-------------------------|
| 1         | exp Prostatic Neoplasms/                                                                                                                     | 146,275                 |
| 2         | (prostat* adj3 (cancer* or neoplas* or tumo?r* or malignan* or carcinoma* or adenocarcinoma*)).ti,ab,kf,jw.                                  | 171,850                 |
| 3         | or/1-2 [Prostate Cancer]                                                                                                                     | 194,162                 |
| 4         | exp Liver Neoplasms/                                                                                                                         | 189,788                 |
| 5         | ((liver or hepat*) adj3 (metast* or cancer* or neoplas* or tumo?r* or malignan* or carcinoma* or adenocarcinoma* or secondary)).ti,ab,kf,jw. | 187,059                 |
| 6         | or/4-5 [Liver Cancer]                                                                                                                        | 261,131                 |
| 7         | Neoplasm Metastasis/                                                                                                                         | 113,592                 |
| 8         | metast*.ti,ab,kf.                                                                                                                            | 613,273                 |
| 9         | (secondary adj3 (cancer* or neoplas* or tumo?r* or malignan* or carcinoma* or adenocarcinoma*)).ti,ab,kf.                                    | 21,423                  |
| 10        | or/7-9 [Metastases - Broad]                                                                                                                  | 660,840                 |
| <b>11</b> | <b>3 and 6 and 10 [Broad option]</b>                                                                                                         | <b>957</b>              |
| 12        | (metast* adj3 (liver or hepat* or prostat*)).ti,ab,kf.                                                                                       | 66,626                  |
| 13        | 7 or 9 or 12 [Metastases – Specific]                                                                                                         | 190,628                 |
| <b>14</b> | <b>3 and 6 and 13 [Specific option]</b>                                                                                                      | <b>552</b>              |
| 15        | limit 14 to yr="2000 -Current"                                                                                                               | 464                     |
